# Supplementary material for: Molecular evidence suggests radical revision of species limits in the great speciator white-eye genus Zosterops
Source: Springer Nature journal article supplement (doi:10.1007/s10336-018-1583-7), 2018-07-23

## Supplementary material

Table S1 List of novel samples obtained for this study, including sampling localities and Genbank accession numbers. Contributing museums, collections and institutions are given under Sample ID. Abbreviations: JBP – Jurong Bird Park (Singapore); NPSRP – National Parks Board Singapore Bird Ringing Programme; LKCNHM – Lee Kong Chian Natural History Museum (Singapore); MZB – Museum Zoologicum Bogoriense (Cibinong, West Java); BMNHC – Burke Museum of Natural History and Culture (Seattle); HKBRT – Hong Kong Bird Watching Society Ringing Team.

| S/N. | Sample ID                    | Species ID (following this study) | Locality                          | GenBank Accession number (ND2, cytb) |
|------|------------------------------|-----------------------------------|-----------------------------------|--------------------------------------|
| 1    | <i>simplex</i> - JBP01       | <i>Zosterops simplex simplex</i>  | Singapore (captive)               | MH357450, MH357381                   |
| 2    | <i>erwini</i> - JBP02        | <i>Zosterops simplex erwini</i>   | Singapore (captive)               | MH357451, MH357412                   |
| 3    | <i>erwini</i> - JBP03        | <i>Zosterops simplex erwini</i>   | Singapore (captive)               | MH357452, MH357410                   |
| 4    | <i>erwini</i> - JBP04        | <i>Zosterops simplex erwini</i>   | Singapore (captive)               | MH357453, MH357409                   |
| 5    | <i>erwini</i> - JBP05        | <i>Zosterops simplex erwini</i>   | Singapore (captive)               | MH357454, MH357408                   |
| 6    | <i>simplex</i> - JBP06       | <i>Zosterops simplex simplex</i>  | Singapore (captive)               | MH357455, MH357379                   |
| 7    | <i>erwini</i> - JBP09        | <i>Zosterops simplex erwini</i>   | Singapore (captive)               | MH357456, MH357407                   |
| 8    | <i>simplex</i> - JBP10       | <i>Zosterops simplex simplex</i>  | Singapore (captive)               | MH357482, MH357380                   |
| 9    | <i>erwini</i> - JBP11        | <i>Zosterops simplex erwini</i>   | Singapore (captive)               | [NA], MH357418                       |
| 10   | <i>erwini</i> - JBP13        | <i>Zosterops simplex erwini</i>   | Singapore (captive)               | [NA], MH357417                       |
| 11   | <i>erwini</i> - JBP14        | <i>Zosterops simplex erwini</i>   | Singapore (captive)               | MH357476, MH357416                   |
| 12   | <i>erwini</i> - JBP15        | <i>Zosterops simplex erwini</i>   | Singapore (captive)               | MH357475, [NA]                       |
| 13   | <i>erwini</i> - JBP16        | <i>Zosterops simplex erwini</i>   | Singapore (captive)               | MH357477, MH357415                   |
| 14   | <i>erwini</i> - JBP17        | <i>Zosterops simplex erwini</i>   | Singapore (captive)               | [NA], MH357414                       |
| 15   | <i>erwini</i> - JBP18        | <i>Zosterops simplex erwini</i>   | Singapore (captive)               | MH357478, [NA]                       |
| 16   | <i>erwini</i> - JBP19        | <i>Zosterops simplex erwini</i>   | Singapore (captive)               | MH357479, MH357413                   |
| 17   | <i>erwini</i> - JBP20        | <i>Zosterops simplex erwini</i>   | Singapore (captive)               | MH357480, MH357411                   |
| 18   | <i>simplex</i> - NPSRP J3590 | <i>Zosterops simplex simplex</i>  | Springleaf Nature Park, Singapore | MH357481, MH357375                   |
| 19   | <i>erwini</i> - NPSRP J3598  | <i>Zosterops simplex erwini</i>   | Springleaf Nature Park, Singapore | MH357468, MH357423                   |
| 20   | <i>erwini</i> - NPSRP J3485  | <i>Zosterops simplex erwini</i>   | Pulau Ubin, Singapore             | MH357466, MH357424                   |
| 21   | <i>erwini</i> - NPSRP J3472  | <i>Zosterops simplex erwini</i>   | Pulau Ubin, Singapore             | MH357464, MH357425                   |
| 22   | <i>erwini</i> - NPSRP J3823  | <i>Zosterops simplex erwini</i>   | Kent Ridge, Singapore             | MH357467, MH357421                   |

|    |                              |                                      |                                                       |                    |
|----|------------------------------|--------------------------------------|-------------------------------------------------------|--------------------|
| 23 | <i>erwini</i> - NPSRP J3820  | <i>Zosterops simplex erwini</i>      | Kent Ridge, Singapore                                 | MH357465, MH357422 |
| 24 | <i>erwini</i> - NPSRP J4058  | <i>Zosterops simplex erwini</i>      | Pulau Ubin, Singapore                                 | MH357469, MH357420 |
| 25 | <i>erwini</i> - NPSRP J4059  | <i>Zosterops simplex erwini</i>      | Pulau Ubin, Singapore                                 | MH357470, MH357419 |
| 26 | <i>erwini</i> - LKCNHM CR122 | <i>Zosterops simplex simplex</i>     | Greenridge Crescent, Singapore                        | MH357485, MH357378 |
| 27 | <i>erwini</i> - LKCNHM CR139 | <i>Zosterops simplex erwini</i>      | Bishan, Singapore                                     | MH357471, MH357435 |
| 28 | <i>erwini</i> - LKCNHM CR158 | <i>Zosterops simplex erwini</i>      | Clementi, Singapore                                   | MH357472, MH357434 |
| 29 | <i>erwini</i> - LKCNHM CR159 | <i>Zosterops simplex erwini</i>      | Prince George Park, Singapore                         | MH357473, MH357433 |
| 30 | <i>erwini</i> - LKCNHM CR161 | <i>Zosterops simplex simplex</i>     | Unknown locality in Singapore                         | MH357484, MH357377 |
| 31 | <i>erwini</i> - LKCNHM CR162 | <i>Zosterops simplex erwini</i>      | Outside National University Hospital, Singapore       | MH357474, MH357432 |
| 32 | <i>erwini</i> - LKCNHM CR163 | <i>Zosterops simplex simplex</i>     | Campus of National University of Singapore, Singapore | MH357483, MH357376 |
| 33 | <i>melanurus</i> - MZB KM06  | <i>Zosterops melanurus melanurus</i> | Bogor (West Java) bird market (captive)               | MH357486, [NA]     |
| 34 | <i>buxtoni</i> - MZB KM01    | <i>Zosterops melanurus buxtoni</i>   | Bogor (West Java) bird market (captive)               | MH357487, MH357438 |
| 35 | <i>melanurus</i> - MZB KM07  | <i>Zosterops melanurus melanurus</i> | Bogor (West Java) bird market (captive)               | MH357488, MH357405 |
| 36 | <i>melanurus</i> - MZB KM09  | <i>Zosterops melanurus melanurus</i> | Bogor (West Java) bird market (captive)               | MH357489, MH357404 |
| 37 | <i>buxtoni</i> - MZB KM02    | <i>Zosterops melanurus buxtoni</i>   | Bogor (West Java) bird market (captive)               | MH357490, MH357437 |
| 38 | <i>chloris</i> - MZB KM10    | <i>Zosterops chloris</i>             | Bogor (West Java) bird market (captive)               | MH357458, [NA]     |
| 39 | <i>buxtoni</i> - MZB KM03    | <i>Zosterops melanurus buxtoni</i>   | Bogor (West Java) bird market (captive)               | MH357491, MH357436 |
| 40 | <i>buxtoni</i> - MZB KM04    | <i>Zosterops melanurus buxtoni</i>   | Bogor (West Java) bird market (captive)               | MH357492, MH357440 |
| 41 | <i>buxtoni</i> - MZB KM05    | <i>Zosterops melanurus buxtoni</i>   | Bogor (West Java) bird market (captive)               | MH357493, MH357439 |
| 42 | <i>erwini</i> - LKCNHM PEN01 | <i>Zosterops simplex erwini</i>      | Kedah, Malaysia                                       | MH357459, MH357391 |
| 43 | <i>erwini</i> - LKCNHM PEN02 | <i>Zosterops simplex erwini</i>      | Kedah, Malaysia                                       | MH357460, MH357390 |
| 44 | <i>erwini</i> - LKCNHM PEN03 | <i>Zosterops simplex erwini</i>      | Kedah, Malaysia                                       | MH357461, MH357389 |
| 45 | <i>erwini</i> - LKCNHM PEN04 | <i>Zosterops simplex erwini</i>      | Kedah, Malaysia                                       | MH357462, MH357388 |
| 46 | <i>erwini</i> - LKCNHM PEN05 | <i>Zosterops simplex erwini</i>      | Kedah, Malaysia                                       | MH357463, MH357387 |
| 47 | <i>harterti</i> - MZB NTT001 | <i>Zosterops citrinella harterti</i> | Alor, Indonesia                                       | MH357494, MH357430 |
| 48 | <i>harterti</i> - MZB NTT003 | <i>Zosterops citrinella harterti</i> | Alor, Indonesia                                       | MH357495, MH357428 |
| 49 | <i>harterti</i> - MZB NTT004 | <i>Zosterops citrinella harterti</i> | Alor, Indonesia                                       | MH357496, MH357427 |
| 50 | <i>harterti</i> - MZB NTT005 | <i>Zosterops citrinella harterti</i> | Alor, Indonesia                                       | MH357497, MH357426 |
| 51 | <i>harterti</i> - MZB NTT010 | <i>Zosterops citrinella harterti</i> | Alor, Indonesia                                       | MH357498, MH357429 |

|    |                                 |                                        |                               |                    |
|----|---------------------------------|----------------------------------------|-------------------------------|--------------------|
| 52 | <i>citrinella</i> -MZB NTT062   | <i>Zosterops citrinella citrinella</i> | Kupang, West Timor, Indonesia | MH357499, MH357397 |
| 53 | <i>citrinella</i> -MZB NTT063   | <i>Zosterops citrinella citrinella</i> | Kupang, West Timor, Indonesia | MH357500, MH357396 |
| 54 | <i>citrinella</i> -MZB NTT070   | <i>Zosterops citrinella citrinella</i> | Rote, Indonesia               | MH357501, MH357395 |
| 55 | <i>citrinella</i> -MZB NTT079   | <i>Zosterops citrinella citrinella</i> | Rote, Indonesia               | MH357502, [NA]     |
| 56 | <i>citrinella</i> -MZB NTT086   | <i>Zosterops citrinella citrinella</i> | Rote, Indonesia               | MH357503, MH357394 |
| 57 | <i>citrinella</i> -MZB NTT093   | <i>Zosterops citrinella citrinella</i> | Rote, Indonesia               | MH357504, MH357393 |
| 58 | <i>citrinella</i> -MZB NTT096   | <i>Zosterops citrinella citrinella</i> | Rote, Indonesia               | MH357505, MH357392 |
| 59 | <i>citrinella</i> -MZB NTT101   | <i>Zosterops citrinella citrinella</i> | Rote, Indonesia               | MH357506, MH357403 |
| 60 | <i>citrinella</i> -MZB NTT110   | <i>Zosterops citrinella citrinella</i> | Rote, Indonesia               | MH357507, MH357402 |
| 61 | <i>citrinella</i> -MZB NTT115   | <i>Zosterops citrinella citrinella</i> | Rote, Indonesia               | MH357508, MH357401 |
| 62 | <i>citrinella</i> -MZB NTT123   | <i>Zosterops citrinella citrinella</i> | Rote, Indonesia               | MH357509, MH357400 |
| 63 | <i>citrinella</i> -MZB NTT137   | <i>Zosterops citrinella citrinella</i> | Kupang, West Timor, Indonesia | MH357510, MH357399 |
| 64 | <i>citrinella</i> -MZB NTT138   | <i>Zosterops citrinella citrinella</i> | Kupang, West Timor, Indonesia | MH357511, MH357398 |
| 65 | <i>montanus</i> -MZB TBU18      | <i>Zosterops japonicus montanus</i>    | Taliabu, Indonesia            | MH357513, MH357386 |
| 66 | <i>montanus</i> -MZB TBU19      | <i>Zosterops japonicus montanus</i>    | Taliabu, Indonesia            | MH357514, MH357385 |
| 67 | <i>montanus</i> -MZB TBU22      | <i>Zosterops japonicus montanus</i>    | Taliabu, Indonesia            | MH357515, MH357384 |
| 68 | <i>montanus</i> -MZB TBU23      | <i>Zosterops japonicus montanus</i>    | Taliabu, Indonesia            | MH357516, MH357383 |
| 69 | <i>montanus</i> -MZB TBU27      | <i>Zosterops japonicus montanus</i>    | Taliabu, Indonesia            | MH357517, MH357382 |
| 70 | <i>salvadorii</i> -LKC NHM PE01 | <i>Zosterops simplex salvadorii</i>    | Enggano Island, Indonesia     | MH357512, MH357431 |
| 71 | <i>japonicus</i> -BMNHC PJG224  | <i>Zosterops japonicus japonicus</i>   | Hawaii, USA                   | MH357457, MH357406 |
| 72 | <i>simplex</i> -HKBRT 16HK152   | <i>Zosterops simplex simplex</i>       | Mai Po, Hong Kong             | MH357518, MH357442 |
| 73 | <i>simplex</i> -HKBRT 16HK045   | <i>Zosterops simplex simplex</i>       | Mai Po, Hong Kong             | MH357524, [NA]     |
| 74 | <i>simplex</i> -HKBRT 16HK116   | <i>Zosterops simplex simplex</i>       | Mai Po, Hong Kong             | MH357521, MH357444 |
| 75 | <i>simplex</i> -HKBRT 16HK043   | <i>Zosterops simplex simplex</i>       | Mai Po, Hong Kong             | MH357522, MH357449 |
| 76 | <i>simplex</i> -HKBRT 16HK046   | <i>Zosterops simplex simplex</i>       | Mai Po, Hong Kong             | MH357525, MH357447 |
| 77 | <i>simplex</i> -HKBRT 16HK163   | <i>Zosterops simplex simplex</i>       | Mai Po, Hong Kong             | MH357519, MH357441 |
| 78 | <i>simplex</i> -HKBRT 16HK058   | <i>Zosterops simplex simplex</i>       | Mai Po, Hong Kong             | MH357520, MH357445 |
| 79 | <i>simplex</i> -HKBRT 16HK044   | <i>Zosterops simplex simplex</i>       | Mai Po, Hong Kong             | MH357523, MH357448 |
| 80 | <i>simplex</i> -HKBRT 16HK054   | <i>Zosterops simplex simplex</i>       | Mai Po, Hong Kong             | [NA], MH357446     |
| 81 | <i>simplex</i> -HKBRT 16HK146   | <i>Zosterops simplex simplex</i>       | Mai Po, Hong Kong             | [NA], MH357443     |

Table S2 Complete list of GenBank ND2 and cytb gene sequences obtained for this study.

| S/N. | GenBank Accession No. | Species ID (following this study)           | Location                  | ND2 gene | cytb gene |
|------|-----------------------|---------------------------------------------|---------------------------|----------|-----------|
| 1    | FJ460807              | <i>Zosterops citrinella unicus-02</i>       | Flores Island, Indonesia  | x        |           |
| 2    | KC540183              | <i>Zosterops citrinella unicus-01</i>       | Lesser Sundas             | x        |           |
| 3    | KJ455705              | <i>Zosterops palpebrosus palpebrosus-01</i> | Himalayas                 | x        |           |
| 4    | FJ460806              | <i>Zosterops palpebrosus palpebrosus-02</i> | Nepal                     | x        |           |
| 5    | FJ460801              | <i>Zosterops palpebrosus siamensis-01</i>   | North Vietnam             | x        |           |
| 6    | KT310496              | <i>Zosterops simplex simplex-01</i>         | Yunnan, China             | x        |           |
| 7    | DQ861968              | <i>Zosterops simplex simplex-02</i>         | Yunnan, China             | x        |           |
| 8    | GU724482              | <i>Zosterops simplex simplex-03</i>         | Yunnan, China             | x        |           |
| 9    | FJ460798              | <i>Zosterops chloris-02</i>                 | Sulawesi, Indonesia       | x        |           |
| 10   | FJ460815              | <i>Zosterops citrinella citrinella-01</i>   | Roti Island, Indonesia    | x        |           |
| 11   | FJ460809              | <i>Zosterops atrifrons</i>                  | Sulawesi, Indonesia       | x        |           |
| 12   | FJ460802              | <i>Zosterops atricapilla-01</i>             | Borneo                    | x        |           |
| 13   | FJ173338              | <i>Zosterops atricapilla-02</i>             | Borneo                    | x        |           |
| 14   | FJ460810              | <i>Zosterops japonicus montanus-01</i>      | Sulawesi, Indonesia       | x        |           |
| 15   | FJ173367              | <i>Zosterops japonicus montanus-02</i>      | Sulawesi, Indonesia       | x        |           |
| 16   | FJ173365              | <i>Zosterops japonicus pectoralis-PH1</i>   | Negros, Philippines       | x        |           |
| 17   | FJ173364              | <i>Zosterops japonicus pectoralis-PH2</i>   | Negros, Philippines       | x        |           |
| 18   | FJ173362              | <i>Zosterops japonicus diuatae-PH3</i>      | Mindanao, Philippines     | x        |           |
| 19   | FJ173354              | <i>Zosterops japonicus diuatae-PH4</i>      | Mindanao, Philippines     | x        |           |
| 20   | FJ173345              | <i>Zosterops japonicus ssp.-PH5</i>         | Panay, Philippines        | x        |           |
| 21   | FJ173344              | <i>Zosterops japonicus ssp.-PH6</i>         | Panay, Philippines        | x        |           |
| 22   | FJ173339              | <i>Zosterops japonicus whiteheadi-PH7</i>   | Luzon, Philippines        | x        |           |
| 23   | FJ173340              | <i>Zosterops japonicus whiteheadi-PH8</i>   | Luzon, Philippines        | x        |           |
| 24   | FJ460797              | <i>Woodfordia superciliosa</i>              | Rennell, Solomon Islands  | x        |           |
| 25   | FJ460805              | <i>Zosterops flavifrons</i>                 | Vanuatu                   | x        |           |
| 26   | FJ460812              | <i>Zosterops luteus</i>                     | Australia                 | x        |           |
| 27   | FJ460817              | <i>Zosterops metcalfi</i>                   | Choiseul, Solomon Islands | x        |           |

---

|    |          |                                              |                               |   |
|----|----------|----------------------------------------------|-------------------------------|---|
| 28 | FJ460836 | <i>Zosterops ugiensis</i>                    | Makira, Solomon Islands       | x |
| 29 | FJ460828 | <i>Zosterops vellalavella</i>                | Vellalavella, Solomon Islands | x |
| 30 | FJ460818 | <i>Zosterops rennellianus</i>                | Rennel, Solomon Islands       | x |
| 31 | FJ460829 | <i>Zosterops fuscicapillus</i>               | Louisiade Islands             | x |
| 32 | FJ460834 | <i>Zosterops luteirostris</i>                | Ghizo Island, Solomon Islands | x |
| 33 | FJ460835 | <i>Zosterops splendidus</i>                  | Rannonga, Solomon Islands     | x |
| 34 | FJ460832 | <i>Zosterops rendovae</i>                    | Rendova, Solomon Islands      | x |
| 35 | FJ460814 | <i>Zosterops lateralis-01</i>                | Australia                     | x |
| 36 | FJ460804 | <i>Zosterops lateralis-02</i>                | Vanuatu                       | x |
| 37 | FJ460833 | <i>Zosterops murphyi</i>                     | Kolombangara, Solomon Islands | x |
| 38 | KY765098 | <i>Zosterops palpebrosus egregius-01</i>     | Sri Lanka                     | x |
| 39 | KY765139 | <i>Zosterops palpebrosus egregius-02</i>     | Sri Lanka                     | x |
| 40 | KY765095 | <i>Zosterops palpebrosus egregius-03</i>     | Sri Lanka                     | x |
| 41 | KY765096 | <i>Zosterops palpebrosus egregius-04</i>     | Sri Lanka                     | x |
| 42 | KY765099 | <i>Zosterops palpebrosus egregius-05</i>     | Sri Lanka                     | x |
| 43 | KY765097 | <i>Zosterops palpebrosus egregius-06</i>     | Sri Lanka                     | x |
| 44 | KY765094 | <i>Zosterops palpebrosus egregius-07</i>     | Sri Lanka                     | x |
| 45 | KY765107 | <i>Zosterops palpebrosus nilgiriensis-01</i> | Kerala, India                 | x |
| 46 | KY765109 | <i>Zosterops palpebrosus nilgiriensis-02</i> | Kerala, India                 | x |
| 47 | KY765104 | <i>Zosterops palpebrosus nilgiriensis-03</i> | Kerala, India                 | x |
| 48 | KY765101 | <i>Zosterops palpebrosus nilgiriensis-04</i> | Kerala, India                 | x |
| 49 | KY765108 | <i>Zosterops palpebrosus nilgiriensis-05</i> | Kerala, India                 | x |
| 50 | KY765110 | <i>Zosterops palpebrosus nilgiriensis-06</i> | Kerala, India                 | x |
| 51 | KY765102 | <i>Zosterops palpebrosus nilgiriensis-07</i> | Kerala, India                 | x |
| 52 | KY765103 | <i>Zosterops palpebrosus nilgiriensis-08</i> | Kerala, India                 | x |
| 53 | KY765105 | <i>Zosterops palpebrosus nilgiriensis-09</i> | Kerala, India                 | x |
| 54 | FJ460811 | <i>Zosterops virens</i>                      | South Africa                  | x |
| 55 | FJ460813 | <i>Zosterops maderaspatanus</i>              | Madagascar                    | x |
| 56 | FJ460803 | <i>Zosterops senegalensis</i>                | Ghana                         | x |
| 57 | FJ460808 | <i>Zosterops nigrorum</i>                    | Luzon, Philippines            | x |
| 58 | KY765093 | <i>Zosterops ceylonensis-01</i>              | Sri Lanka                     | x |
| 59 | KY765092 | <i>Zosterops ceylonensis-02</i>              | Sri Lanka                     | x |

---

|    |          |                                               |                         |   |   |
|----|----------|-----------------------------------------------|-------------------------|---|---|
| 60 | KY765090 | <i>Zosterops ceylonensis</i> -03              | Sri Lanka               | x |   |
| 61 | KY765091 | <i>Zosterops ceylonensis</i> -04              | Sri Lanka               | x |   |
| 62 | FJ460796 | <i>Zosterops emiliae</i>                      | Borneo                  | x |   |
| 63 | FJ460799 | <i>Zosterops abyssinica</i>                   | Captive                 | x |   |
| 64 | FJ460800 | <i>Zosterops erythropleura</i>                | Captive                 | x |   |
| 65 | HQ608850 | <i>Zosterops simplex simplex</i> -04          | Shaanxi, China          |   | x |
| 66 | DQ837523 | <i>Zosterops simplex simplex</i> -05          | Yunnan, China           |   | x |
| 67 | AB248718 | <i>Zosterops simplex simplex</i> -11          | Hong Kong, China        |   | x |
| 68 | AB248717 | <i>Zosterops simplex simplex</i> -12          | Hong Kong, China        |   | x |
| 69 | AB248716 | <i>Zosterops simplex simplex</i> -13          | Hong Kong, China        |   | x |
| 70 | AB248715 | <i>Zosterops simplex simplex</i> -14          | Taiwan (ROC)            |   | x |
| 71 | AB248940 | <i>Zosterops japonicus japonicus</i> -01      | Nagasaki, Japan         |   | x |
| 72 | AB248939 | <i>Zosterops japonicus japonicus</i> -02      | Nagasaki, Japan         |   | x |
| 73 | AB248938 | <i>Zosterops japonicus japonicus</i> -03      | Ibaraki, Japan          |   | x |
| 74 | AB159165 | <i>Zosterops japonicus japonicus</i> -08      | Ibaraki, Japan          |   | x |
| 75 | AB159166 | <i>Zosterops japonicus japonicus</i> -09      | Ibaraki, Japan          |   | x |
| 76 | AB159167 | <i>Zosterops japonicus japonicus</i> -06      | Gyeongsangnam-do, Korea |   | x |
| 77 | AB159168 | <i>Zosterops japonicus japonicus</i> -07      | Gyeongsangnam-do, Korea |   | x |
| 78 | AB248728 | <i>Zosterops japonicus japonicus</i> -10      | Kagoshima, Japan        |   | x |
| 79 | AB248719 | <i>Zosterops melanurus</i> -G01               | Unknown (Traded)        |   | x |
| 80 | DQ837522 | <i>Zosterops palpebrosus palpebrosus</i> -03  | Yunnan, China           |   | x |
| 81 | KJ702869 | <i>Zosterops palpebrosus nilgiriensis</i> -10 | Western Ghats, India    |   | x |
| 82 | KJ702868 | <i>Zosterops palpebrosus nilgiriensis</i> -11 | Western Ghats, India    |   | x |
| 83 | KJ702867 | <i>Zosterops palpebrosus nilgiriensis</i> -12 | Western Ghats, India    |   | x |
| 84 | KJ702866 | <i>Zosterops palpebrosus nilgiriensis</i> -13 | Western Ghats, India    |   | x |
| 85 | KJ702865 | <i>Zosterops palpebrosus nilgiriensis</i> -14 | Western Ghats, India    |   | x |
| 86 | KJ702864 | <i>Zosterops palpebrosus nilgiriensis</i> -15 | Western Ghats, India    |   | x |
| 87 | KJ702863 | <i>Zosterops palpebrosus nilgiriensis</i> -16 | Western Ghats, India    |   | x |
| 88 | KJ702862 | <i>Zosterops palpebrosus nilgiriensis</i> -17 | Western Ghats, India    |   | x |
| 89 | KJ702861 | <i>Zosterops palpebrosus nilgiriensis</i> -18 | Western Ghats, India    |   | x |
| 90 | KJ702860 | <i>Zosterops palpebrosus nilgiriensis</i> -19 | Western Ghats, India    |   | x |
| 91 | KJ702859 | <i>Zosterops palpebrosus nilgiriensis</i> -20 | Western Ghats, India    |   | x |

|    |                        |                                               |                      |            |             |
|----|------------------------|-----------------------------------------------|----------------------|------------|-------------|
| 92 | KJ702858               | <i>Zosterops palpebrosus nilgiriensis</i> -21 | Western Ghats, India |            | x           |
| 93 | JF756836.1/ JF756762.1 | <i>Yuhina brunneiceps</i>                     | Taiwan               | x          | x           |
|    |                        |                                               |                      | ND2 total: | cytb total: |
|    |                        |                                               |                      | 65         | 29          |

Figure S1 Phylogenetic tree of the concatenated genes (ND2 + cytb). Branch support values are indicated by an asterisk (\*) at each node if high (Bayesian posterior probability > 0.95 / maximum likelihood > 0.7) but omitted otherwise. Each terminal taxon name at the tip of the tree is a subspecies epithet.

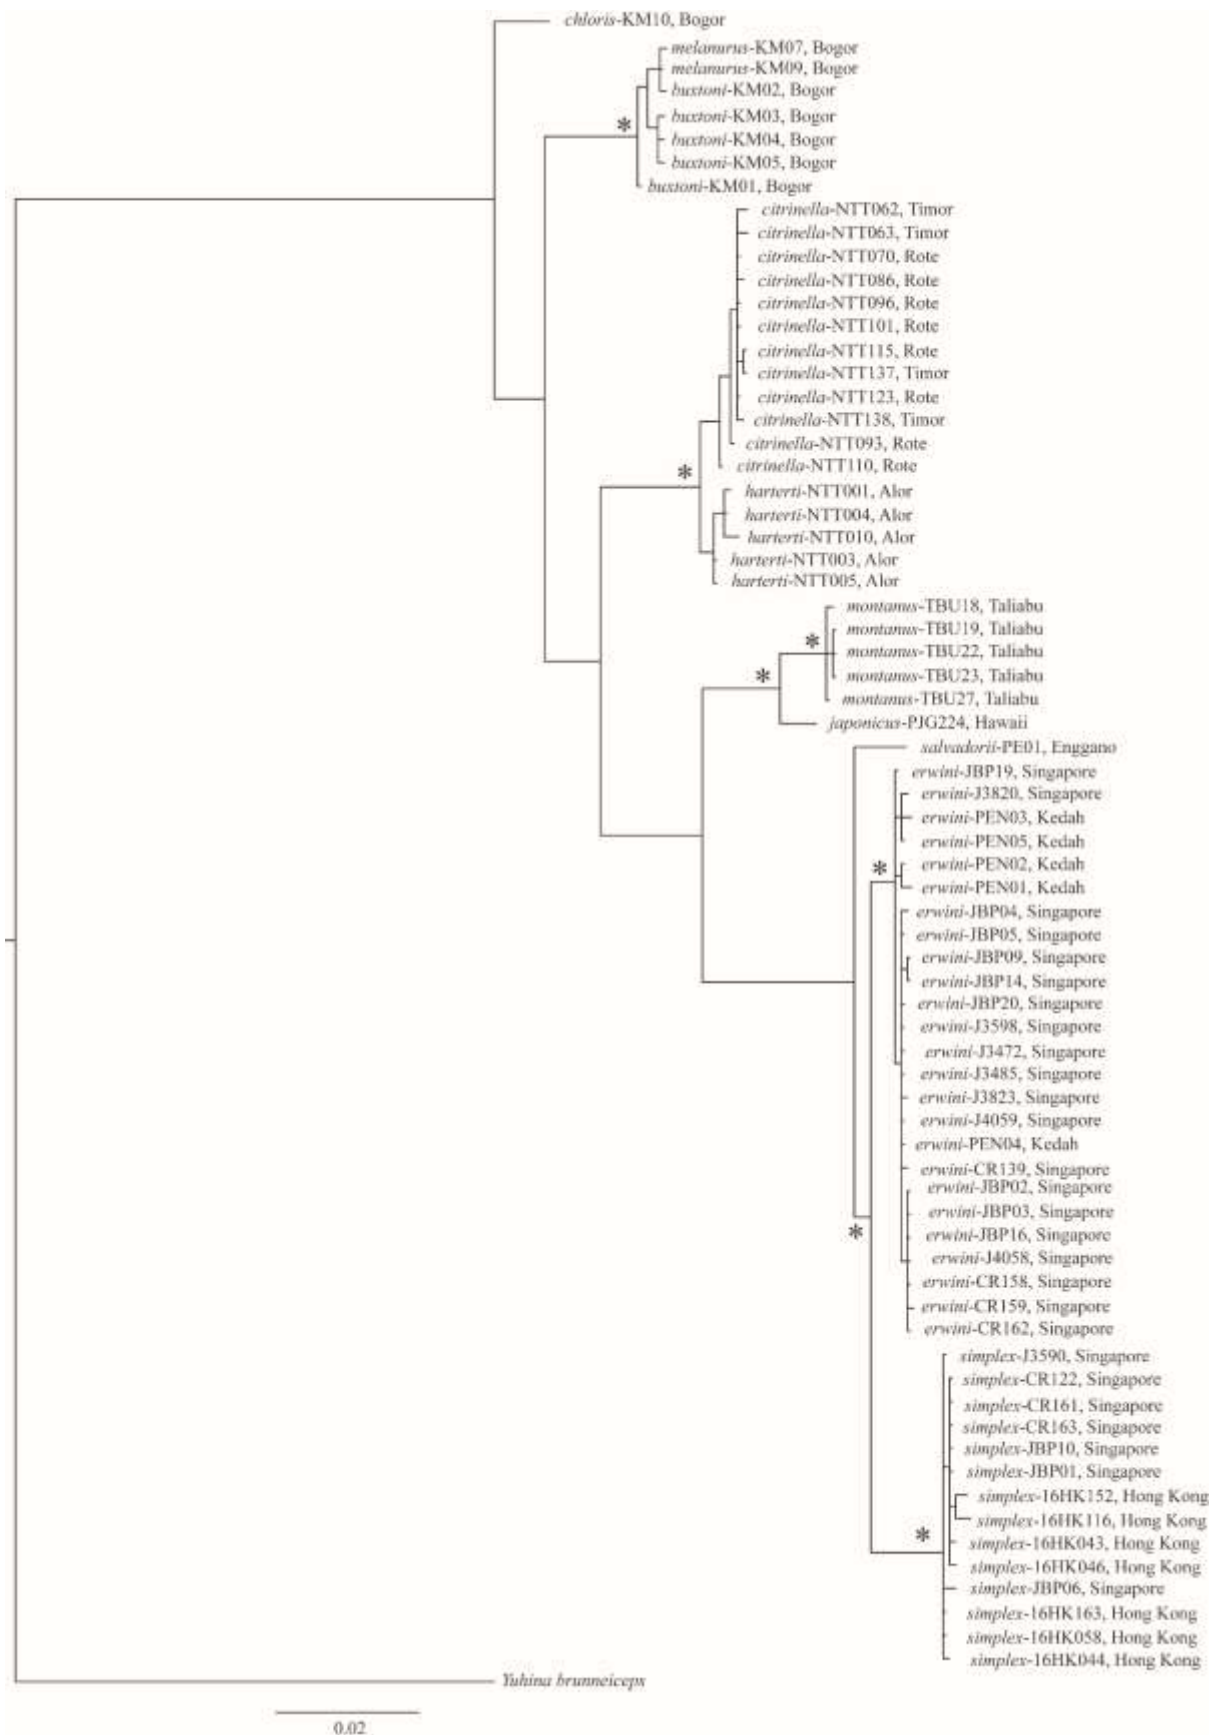

Supplement: 10336_2018_1583_MOESM1_ESM.pdf [file 10336_2018_1583_MOESM1_ESM.pdf]
